# Supplementary material
Source: publisher figshare collection journal article supplement (https://acs.figshare.com/ndownloader/files/3738067)
Supplement: Supplementary file 1 [file 3738067]

---

## Supporting Information

# Engineering Hybrid Metallic Nanostructures Using Single Domain of Block Copolymer Template

Zhicheng Liu<sup>a,b,c</sup>, Tongxin Chang<sup>a,b</sup>, Haiying Huang<sup>a,b\*</sup> and Tianbai He<sup>a,b\*</sup>

a State Key Laboratory of Polymer Physics and Chemistry, Changchun Institute of Applied Chemistry, Chinese Academy of Sciences, Changchun 130022, China

b University of Chinese Academy of Sciences, Beijing 100049, China

c Present Address: School of Materials Science and Engineering, North University of China, Taiyuan 030051, China

**E-mail:** [tbhe@ciac.ac.cn](mailto:tbhe@ciac.ac.cn) and [hyhuang@ciac.ac.cn](mailto:hyhuang@ciac.ac.cn)

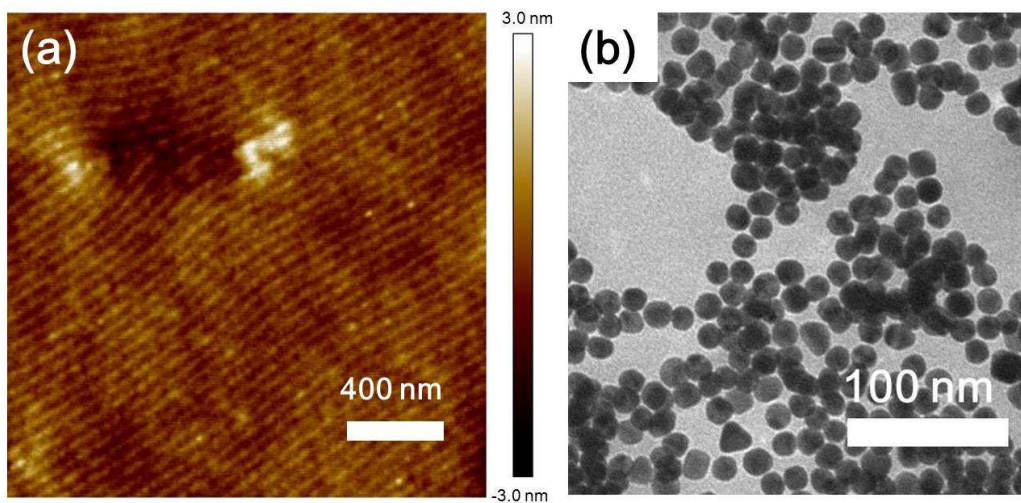

**Figure S1.** (a) AFM height image of PS-*b*-P2VP (62k-26k) cylinder-forming block copolymer template. (b) TEM image of as-synthesized gold nanoparticles.
